# Supplementary material for: Greenland Ice Sheet solid ice discharge from 1986 through 2019
Source: Copernicus journal article supplement (doi:10.5194/essd-2019-240), 2020-01-20
Supplement: Supplementary file [file essd-2019-240-RC1-supplement.pdf]

Review of  
**Greenland Ice Sheet solid ice discharge from 1986 through 2019**  
*by Mankoff et al., 2020.*

The manuscript describes updates to the previously published Greenland-wide ice discharge data paper, including an extension of the time series through 2019, the integration of updated velocity products, and the inclusion of a designated GitHub repository. The updated paper also includes some brief descriptions of changing regional behavior, including the interesting observation that Helheim Glacier (southeast) was briefly the largest-contributing glacier as Jakobshavn Isbræ continues to decelerate. Finally, the authors have refined the discharge time series by excluding data points with less than 50% coverage. The data, methods, and meta-data are transparent and accessible, and the manuscript and discharge data product are thus valuable to the glaciology community.

I have reviewed the updates from Mankoff et al. (2019) and include several minor comments below. The manuscript is publishable once these comments are addressed.

4.4.2: I suggest also adding a statement here that only datapoints with >50% coverage are reported.

Conclusions:

Update statistics in second paragraph beginning with “ice sheet discharge was ~430 G/yr prior to 2000”

It does not seem this is accurate now with the updated velocity. More like ~440 Gt/yr?

Supplement:

Make sure all statistics and numbers are updated, including:

Appendix A: Errors and uncertainties

Fourth paragraph: replace “276 gates and 6002 pixels” with 268 gates and 5830 pixels.

A1 invalid thickness: 5205 valid + 624 invalid = 5829, not 5830.

Second paragraph of A1 and in Figure 1A caption: replace “276 gates” with 268.
